# Supplementary material for: Embryonic transcription factor expression in mice predicts medial amygdala neuronal identity and sex-specific responses to innate behavioral cues
Source: eLife journal article supplement (doi:10.7554/elife.21012), 2017-02-28
Supplement: supp [file elife-21012-supp-v1.zip]

Archive with 9 entries (9 files):
- elife_poa_e21012_Figure_7_Figure_supplement_1.pdf
- elife_poa_e21012_Figure_2_Figure_supplement_1.pdf
- elife_poa_e21012_Figure_5_Figure_supplement_1.pdf
- elife_poa_e21012_Figure_4_Figure_supplement_1.pdf
- elife_poa_e21012_Figure_1_Figure_supplement_3.pdf
- elife_poa_e21012_Figure_1_Figure_supplement_1.pdf
- elife_poa_e21012_Figure_4_Figure_supplement_2.pdf
- elife_poa_e21012_Figure_3_Figure_supplement_1.pdf
- elife_poa_e21012_Figure_1_Figure_Supplement_2.pdf
