# Supplementary figures and images for: Embryonic transcription factor expression in mice predicts medial amygdala neuronal identity and sex-specific responses to innate behavioral cues
Source: eLife journal article supplement (doi:10.7554/elife.21012), 2017-02-28

## Predator Avoidance

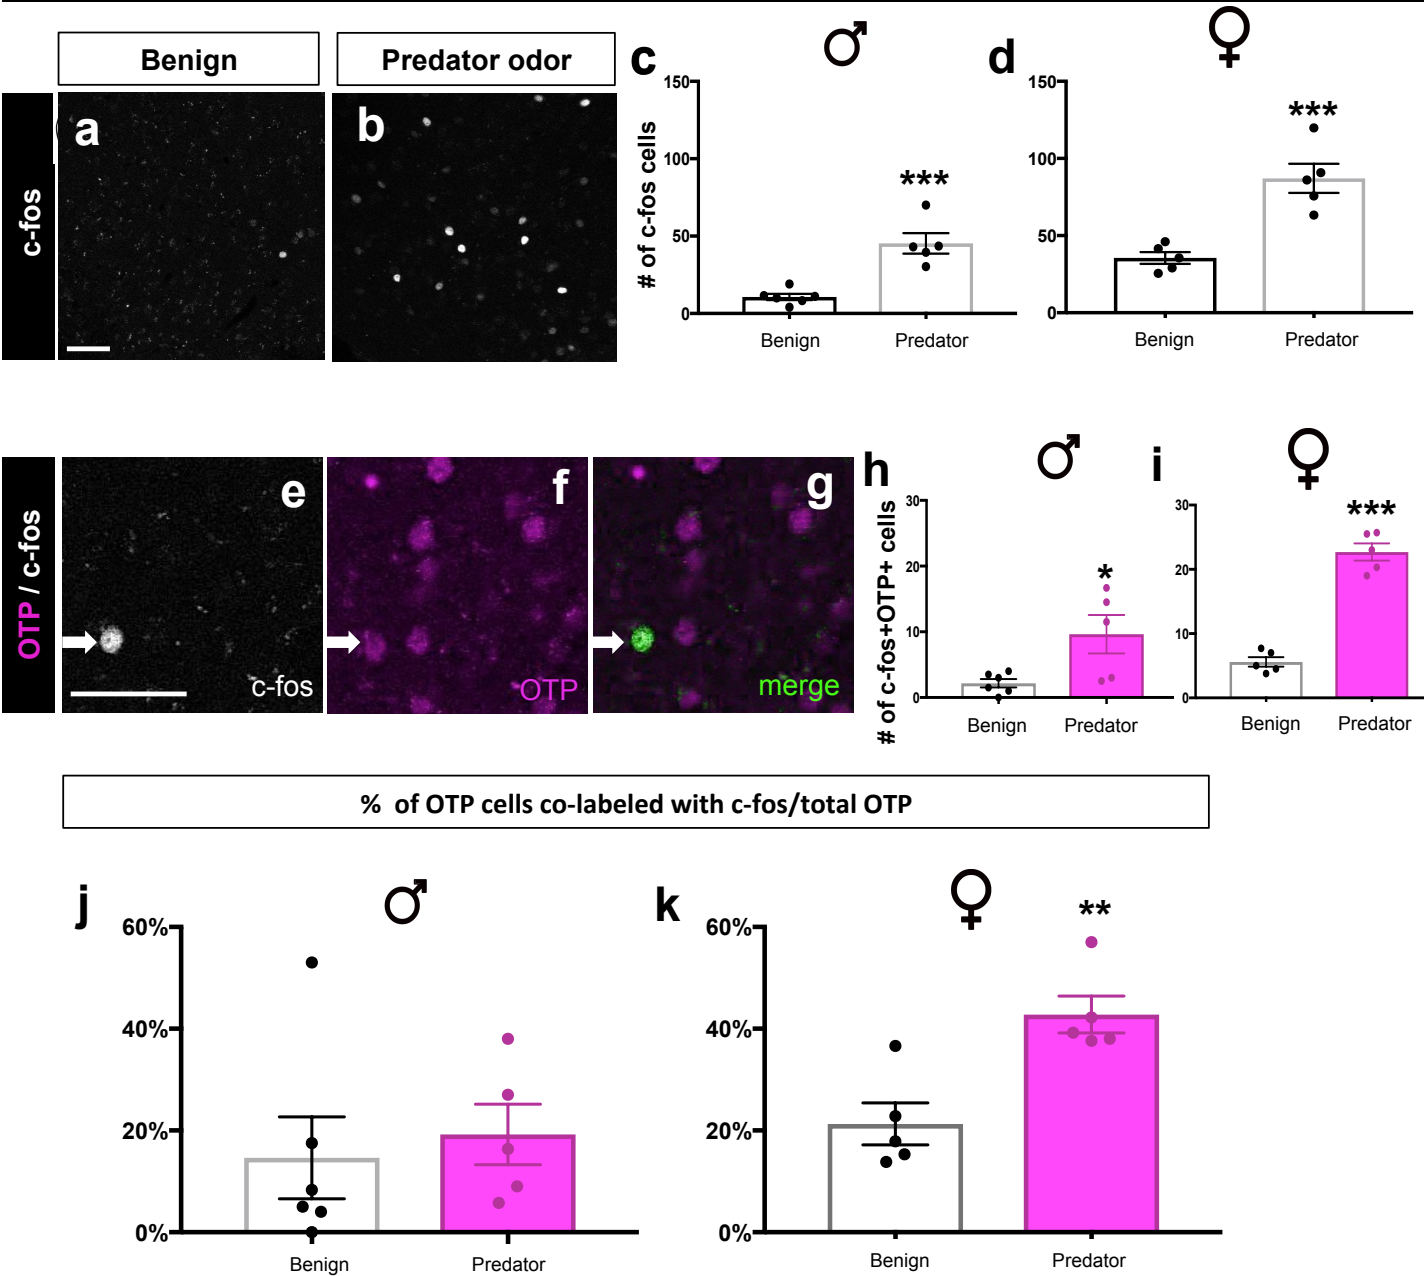

### Figure 7- Figure Supplement 1

Supplement: supp [file elife-21012-supp-v1.zip › elife_poa_e21012_Figure_7_Figure_supplement_1.pdf]

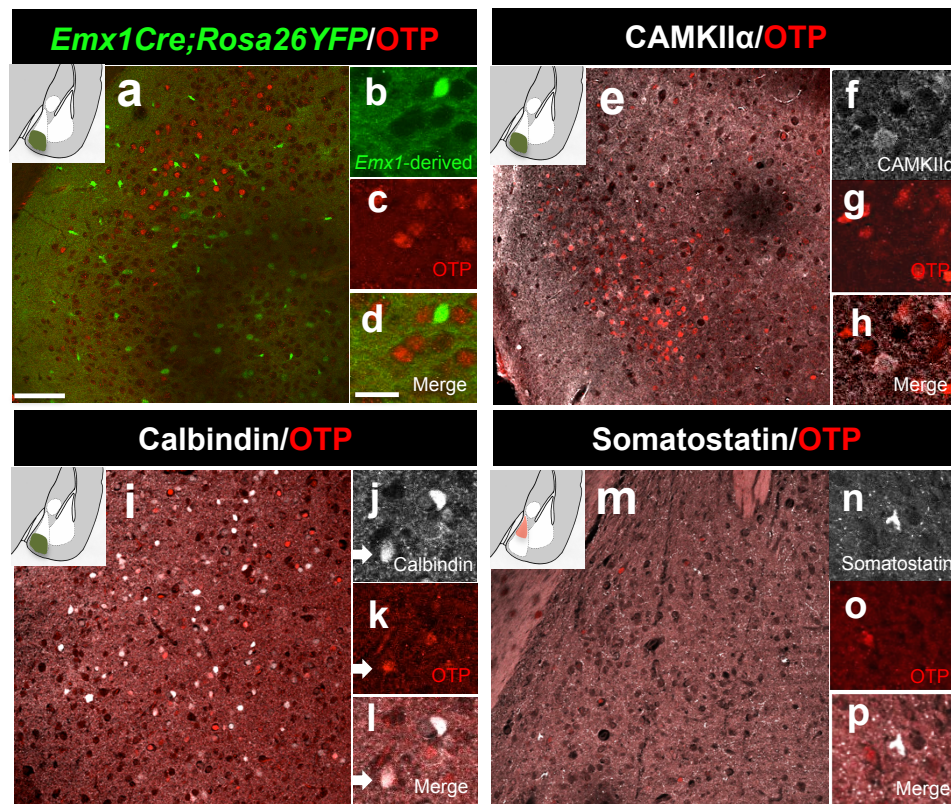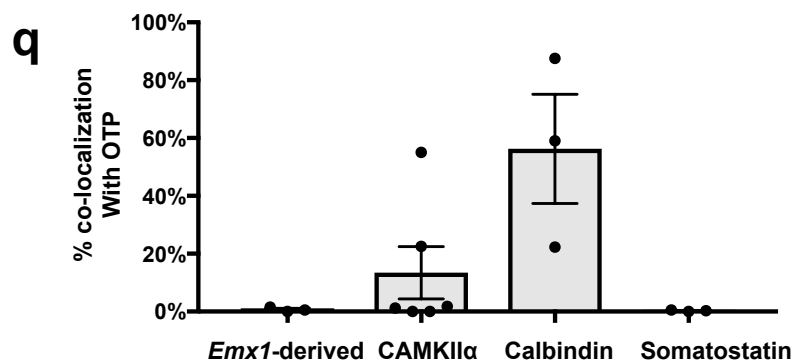

Figure 2- Figure supplement 1

Supplement: supp [file elife-21012-supp-v1.zip › elife_poa_e21012_Figure_2_Figure_supplement_1.pdf]

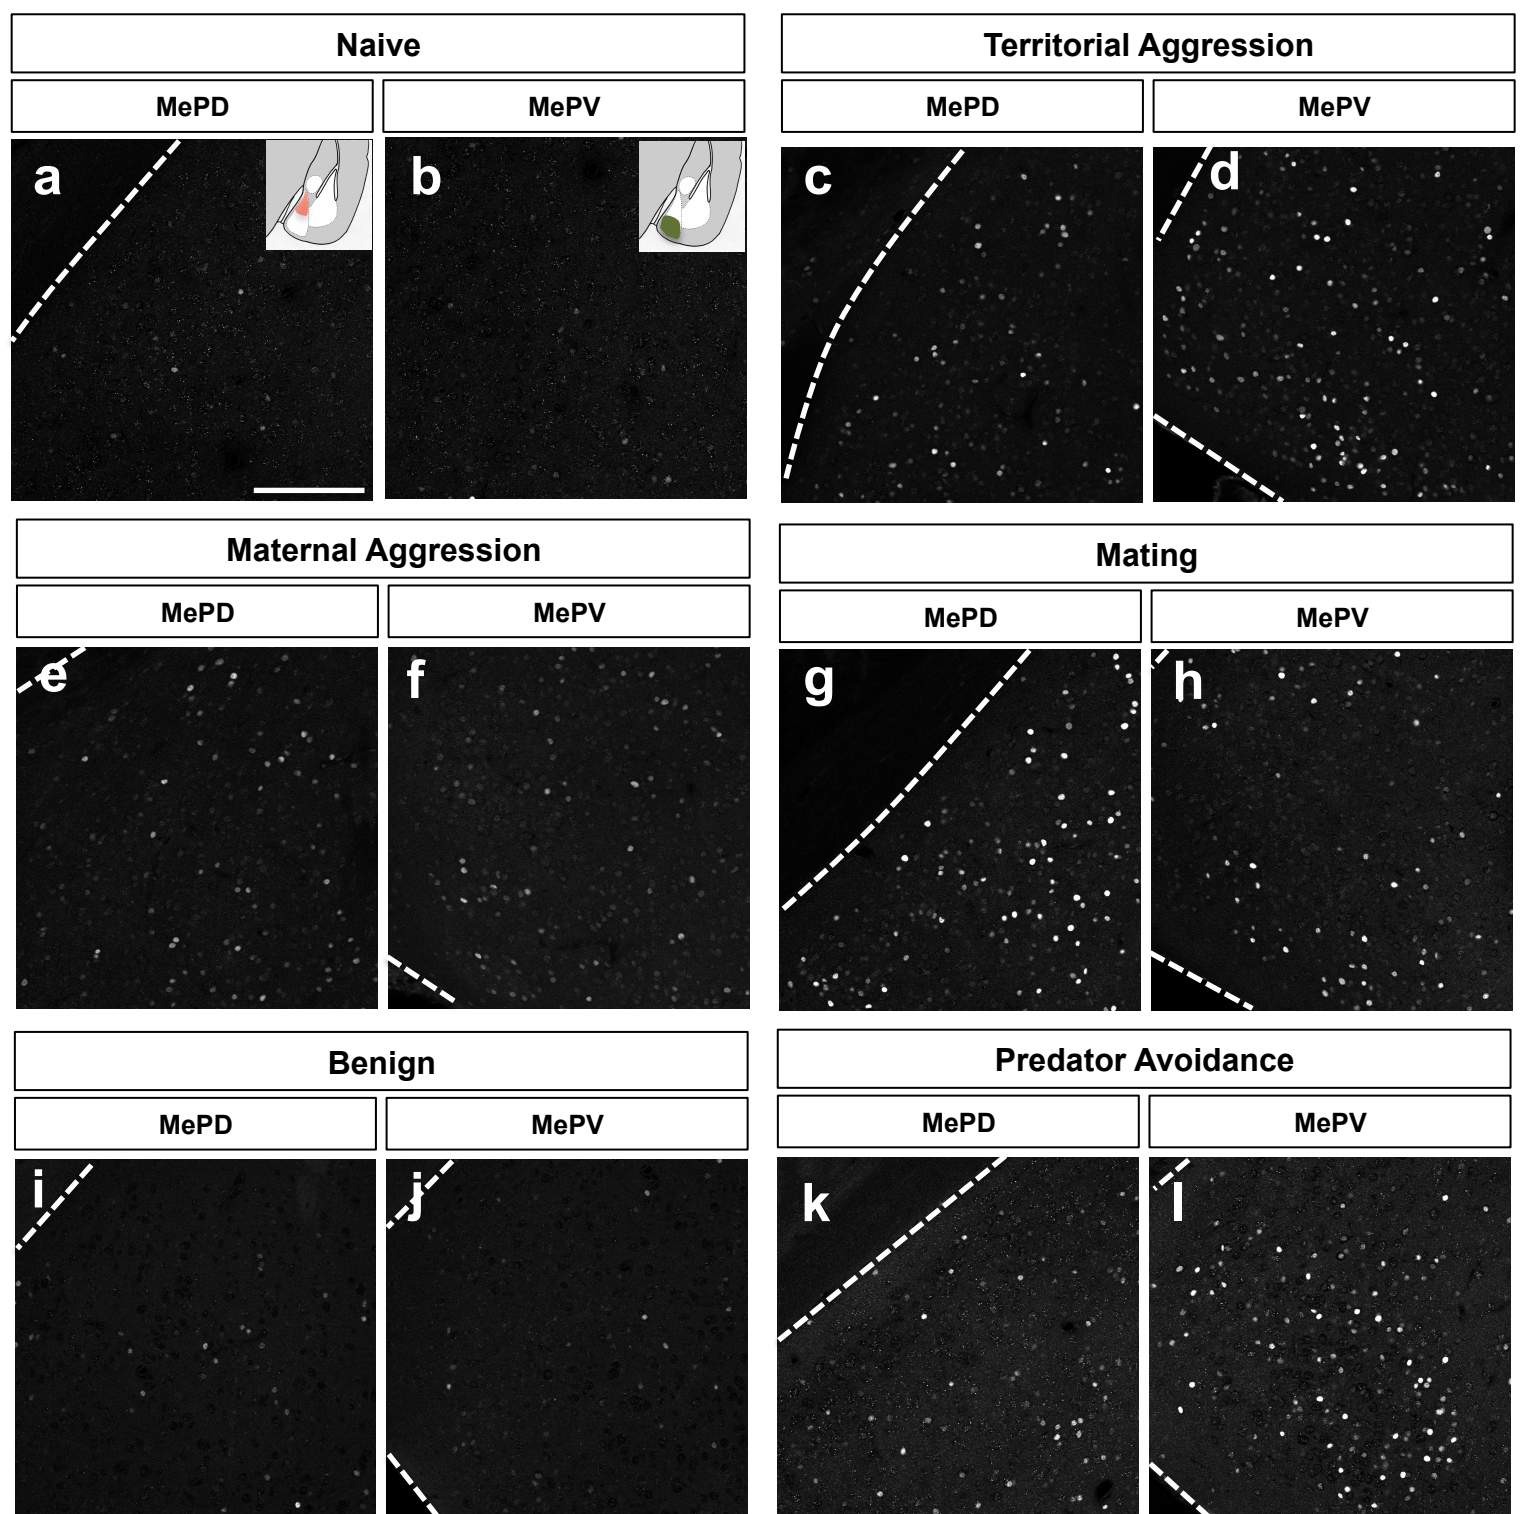

**Figure 5- Figure supplement 1**

Supplement: supp [file elife-21012-supp-v1.zip › elife_poa_e21012_Figure_5_Figure_supplement_1.pdf]

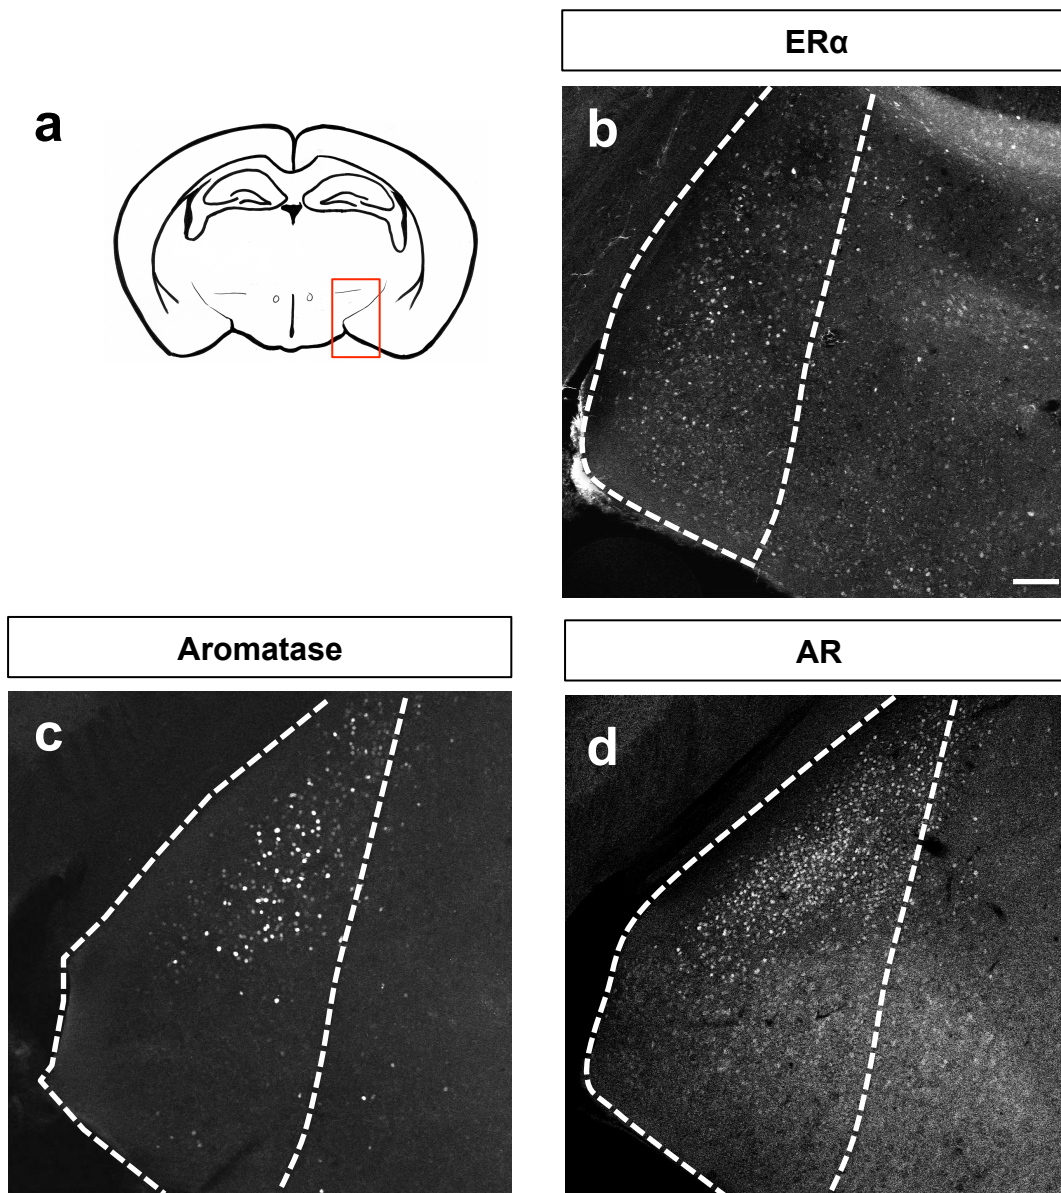

**Figure 4- Figure supplement 1**

Supplement: supp [file elife-21012-supp-v1.zip › elife_poa_e21012_Figure_4_Figure_supplement_1.pdf]

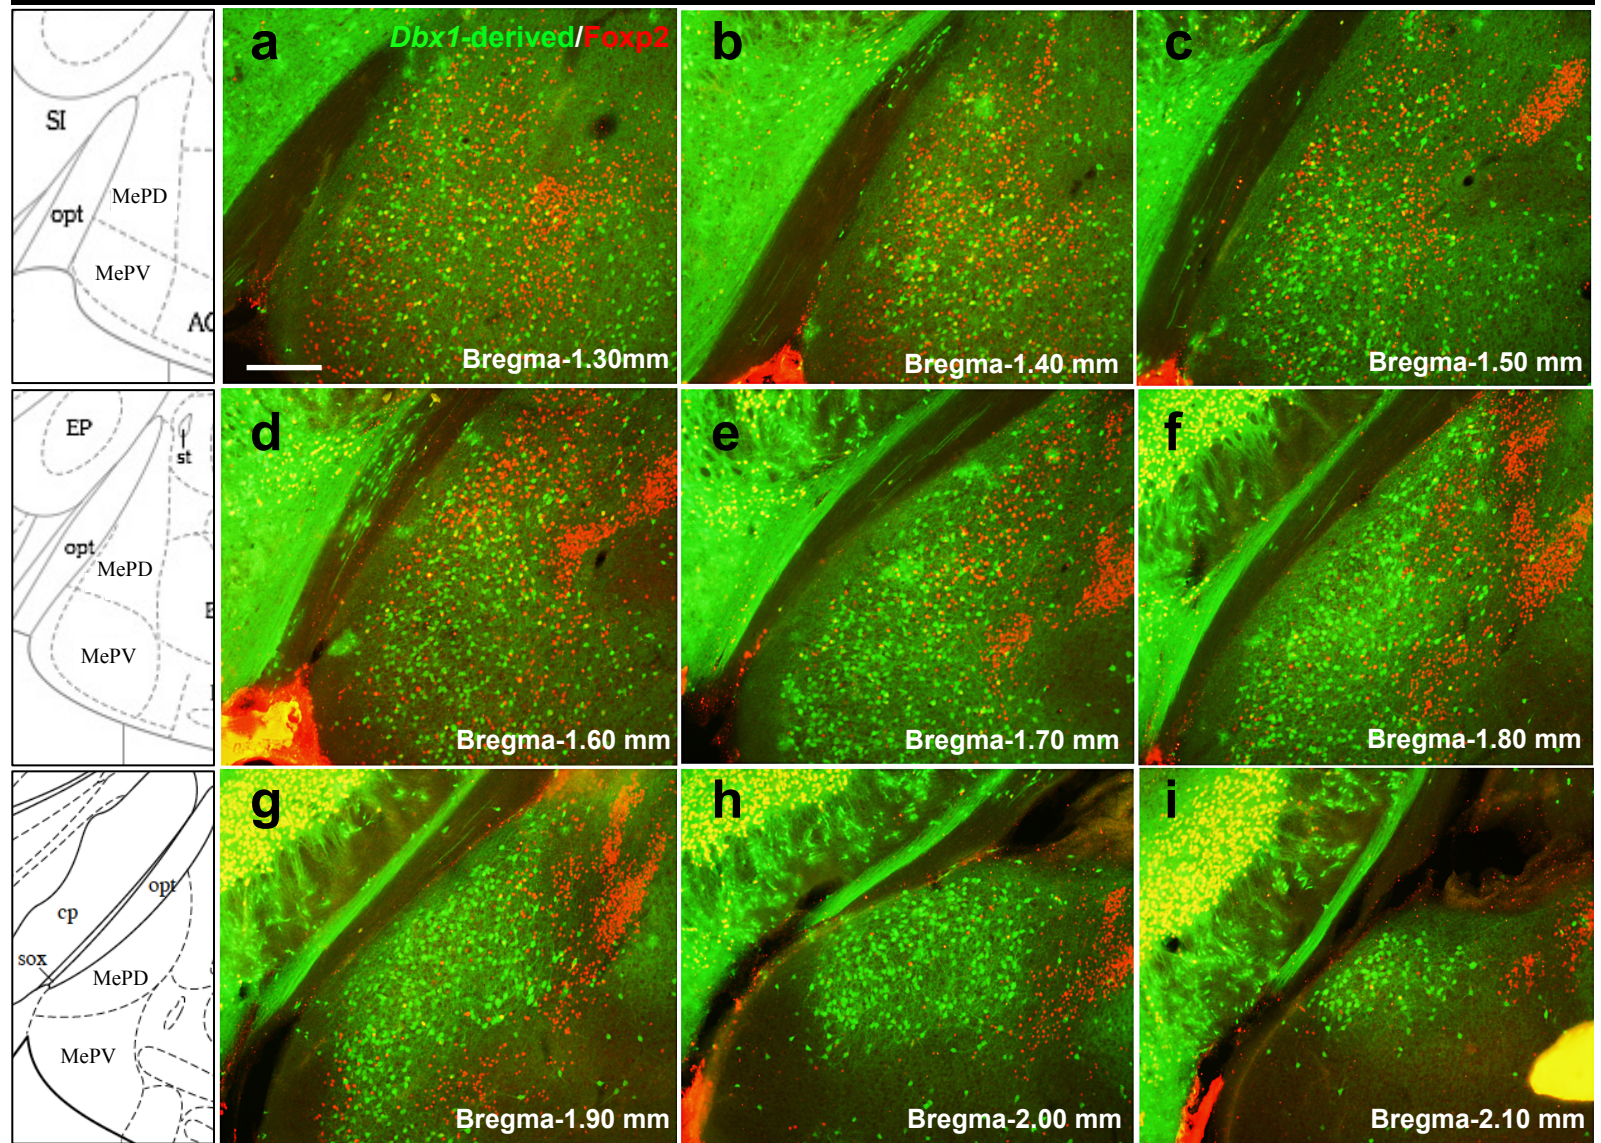

**Figure 1- Figure supplement 3**

Supplement: supp [file elife-21012-supp-v1.zip › elife_poa_e21012_Figure_1_Figure_supplement_3.pdf]

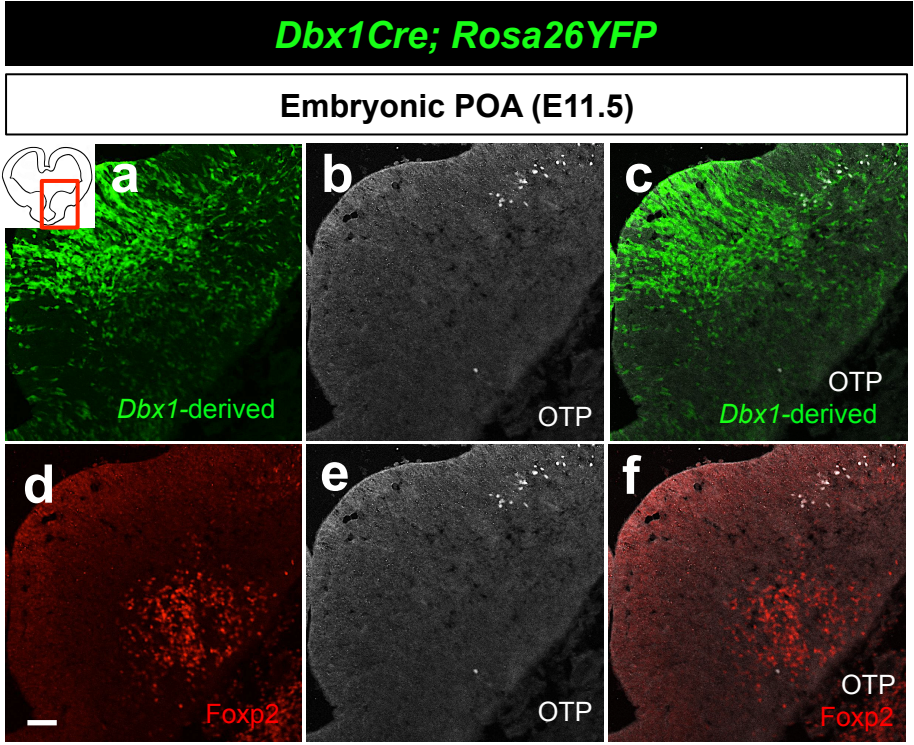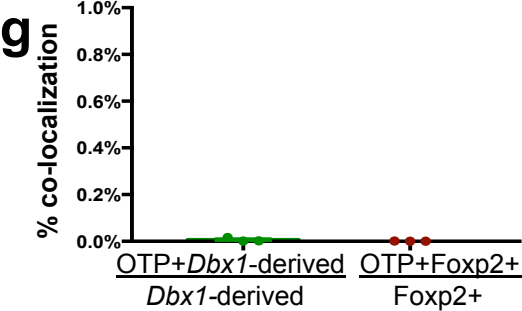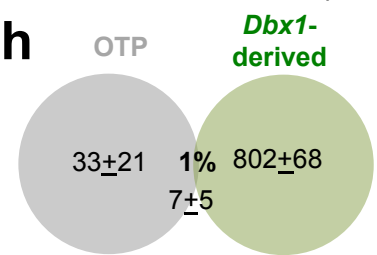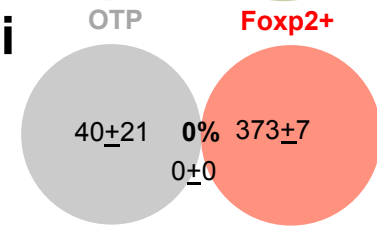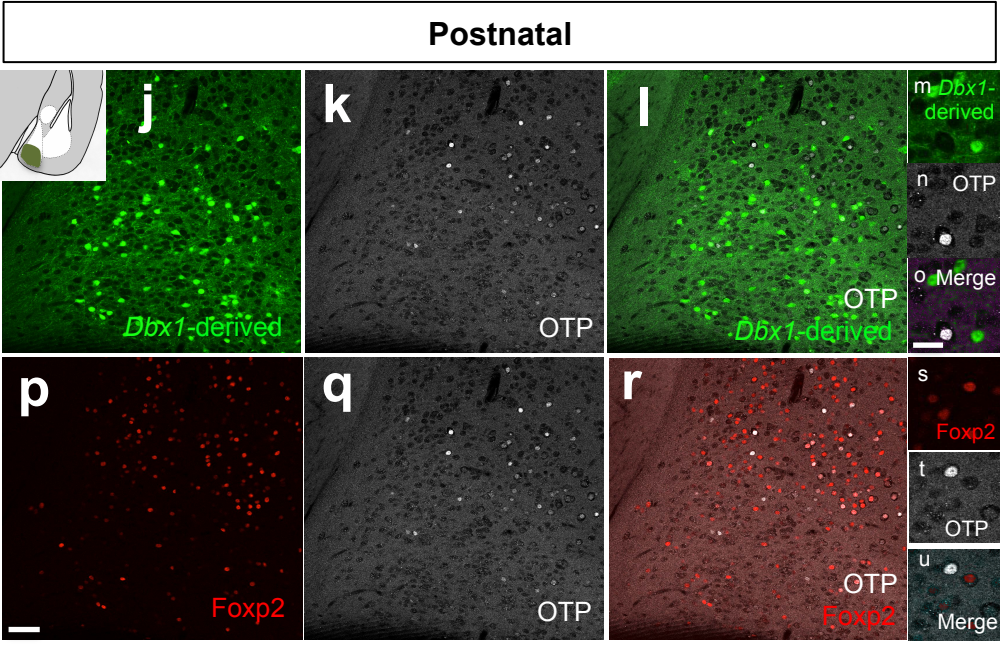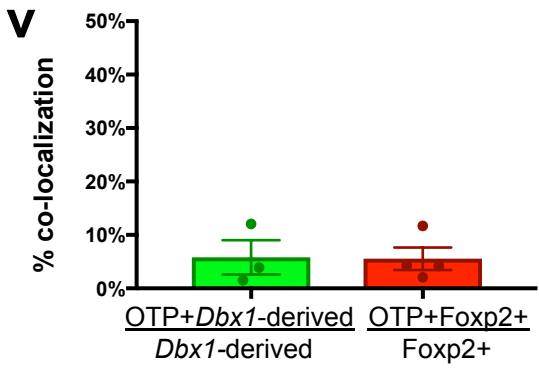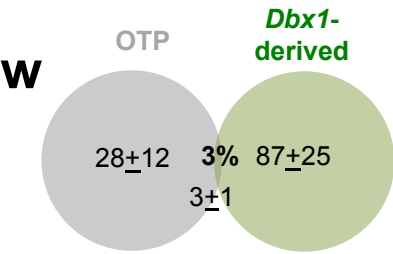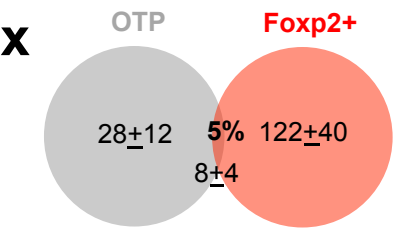

Figure 1- Figure supplement 1

Supplement: supp [file elife-21012-supp-v1.zip › elife_poa_e21012_Figure_1_Figure_supplement_1.pdf]

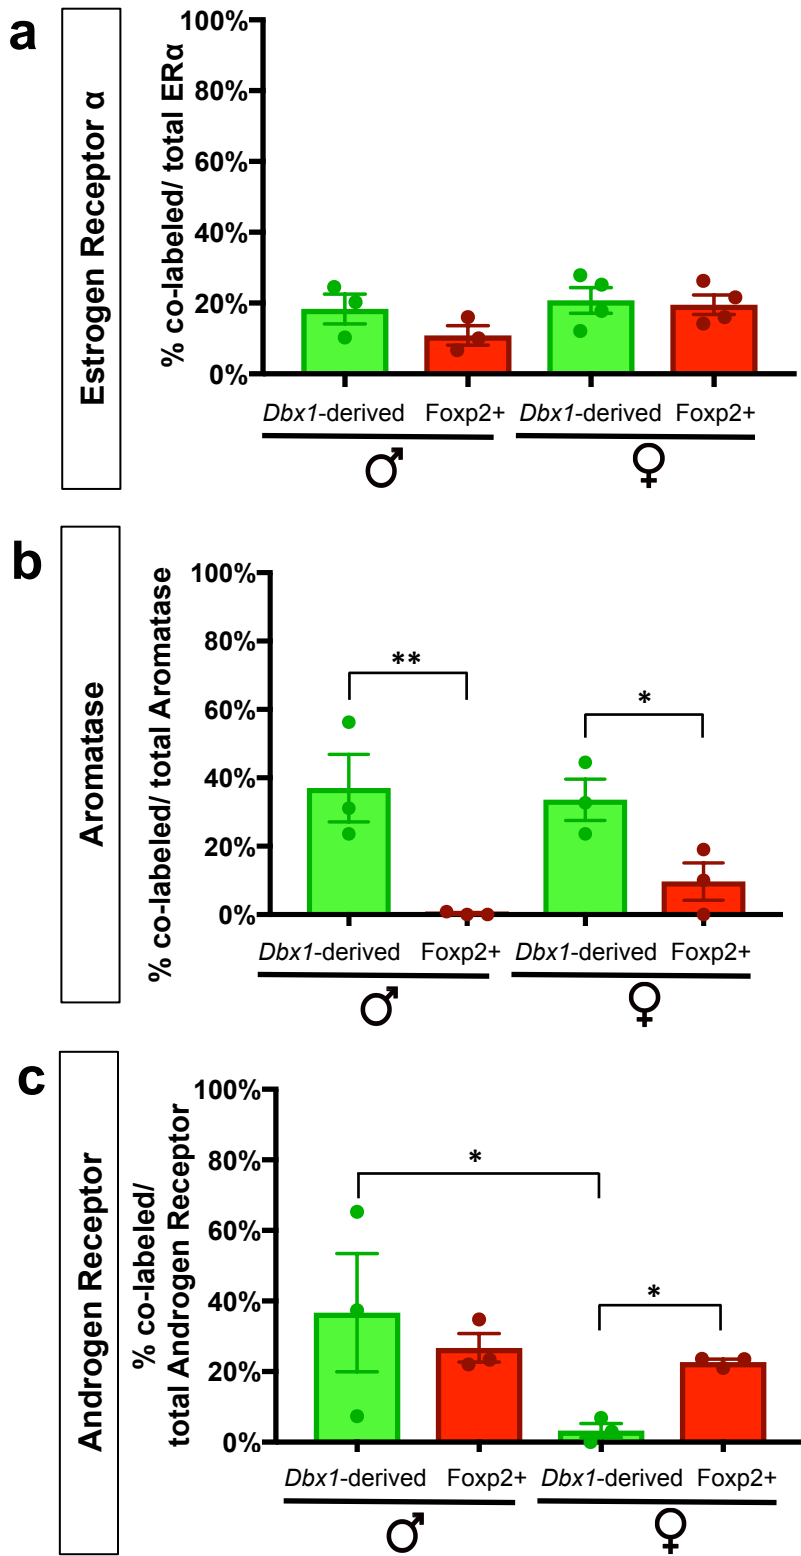

Figure 4- Figure supplement 2

Supplement: supp [file elife-21012-supp-v1.zip › elife_poa_e21012_Figure_4_Figure_supplement_2.pdf]

# Foxp2+ Neuronal Morphologies

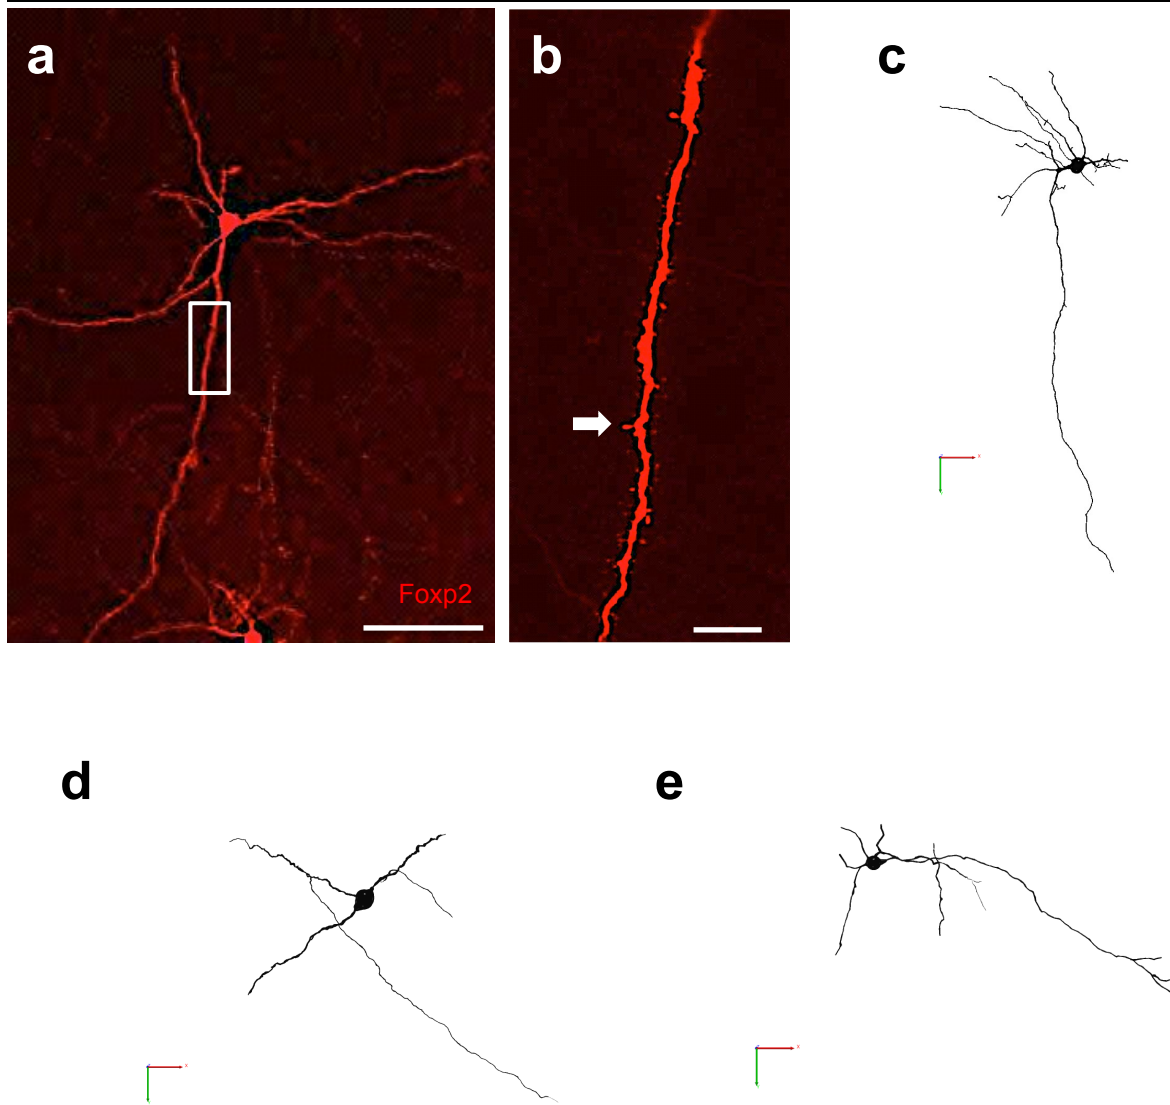

Figure 3- Figure supplement 1

Supplement: supp [file elife-21012-supp-v1.zip › elife_poa_e21012_Figure_3_Figure_supplement_1.pdf]

Embryonic POA (E11.5)

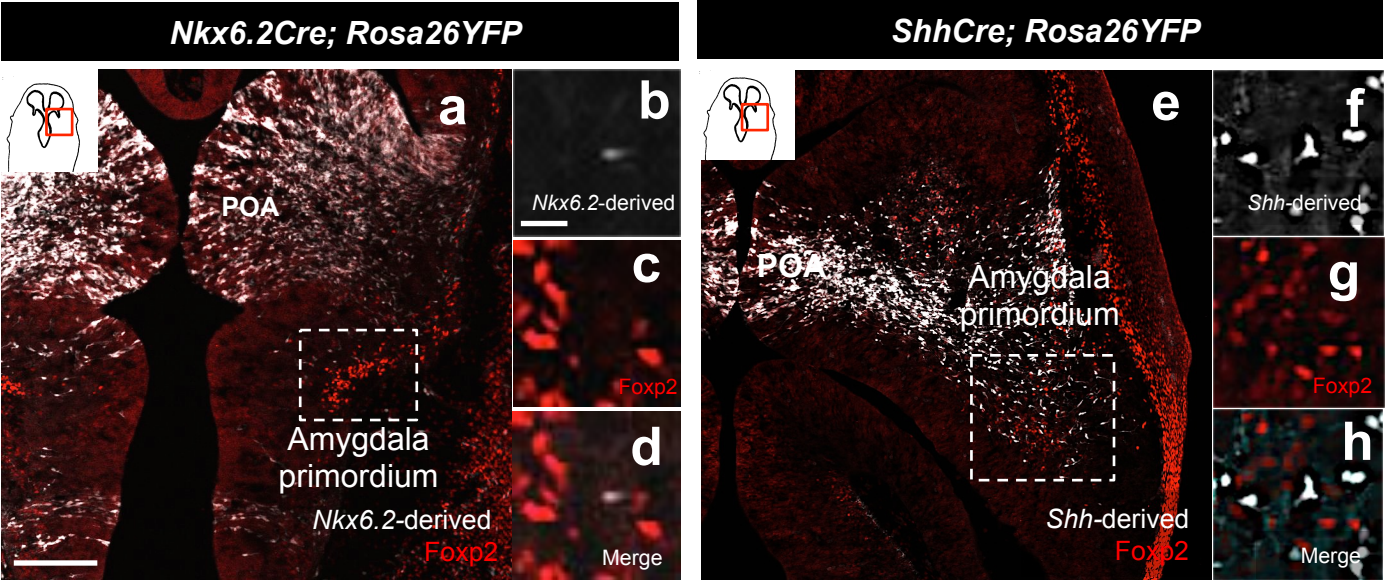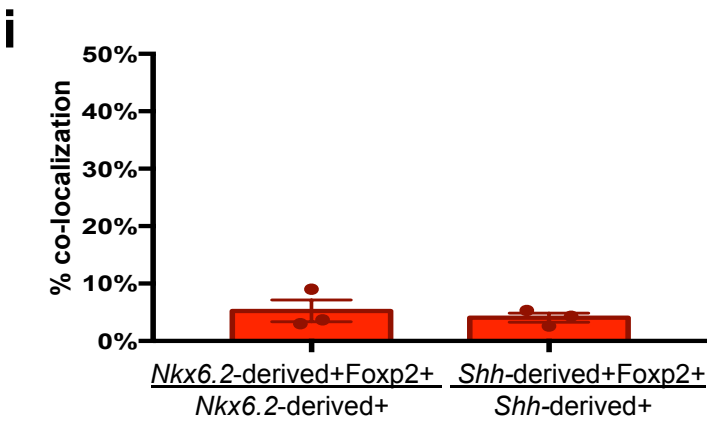

Figure 1- Figure supplement 2

Supplement: supp [file elife-21012-supp-v1.zip › elife_poa_e21012_Figure_1_Figure_Supplement_2.pdf]
